# Supplementary material for: A new strategy for large-scale synthesis of Na0.5Bi0.5TiO3 nanowires and their application in piezocatalytic degradation
Source: Royal Society of Chemistry journal article supplement (doi:10.1039/d1na00024a), 2021-01-01
Supplement: d1na00024a1.pdf [file d1na00024a1.pdf]

## Supporting Information

### A new strategy for large-scale synthesis of $\text{Na}_{0.5}\text{Bi}_{0.5}\text{TiO}_3$ nanowires and their application in piezocatalytic degradation

Rui Huang, Jiang Wu\*, Enzhu Lin, Zihan Kang, Ni Qin\*, Dinghua Bao

State Key Laboratory of Optoelectronic Materials and Technologies, School of Materials Science and Engineering, Sun Yat-Sen University, Guangzhou 510275, China

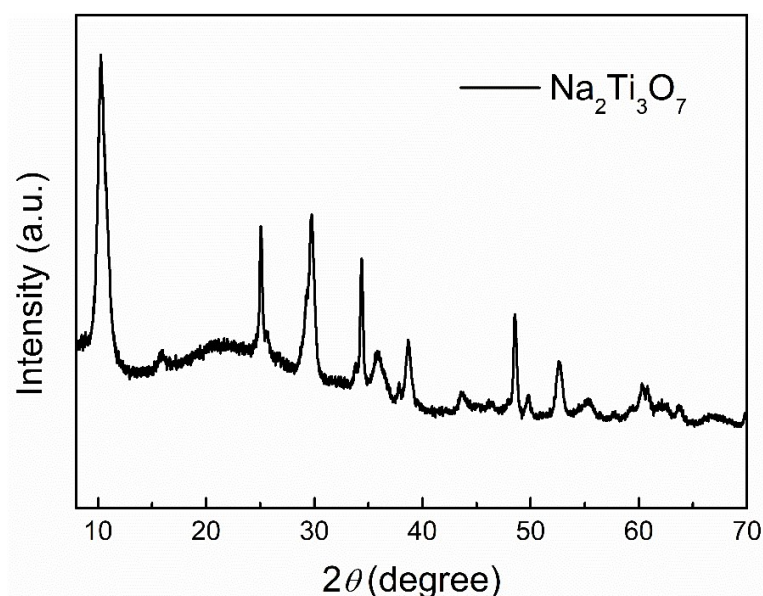

**Fig. S1** XRD pattern of  $\text{Na}_2\text{Ti}_3\text{O}_7$  nanowires.

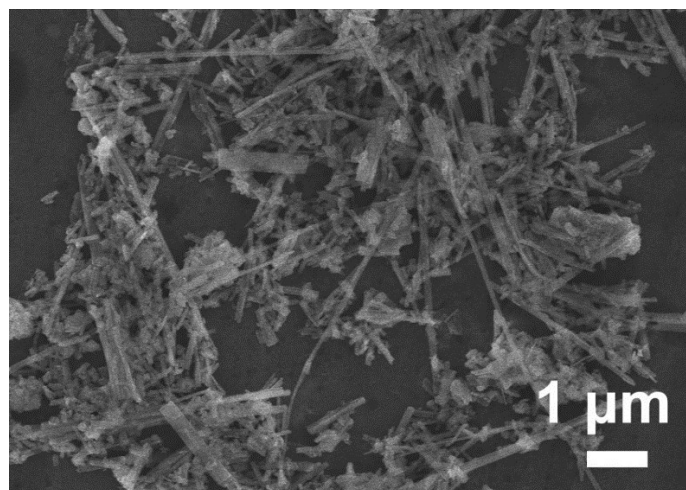

**Fig. S2** SEM image of  $\text{Na}_{0.5}\text{Bi}_{0.5}\text{TiO}_3$  synthesized at 240 °C, 12 h, 10M.

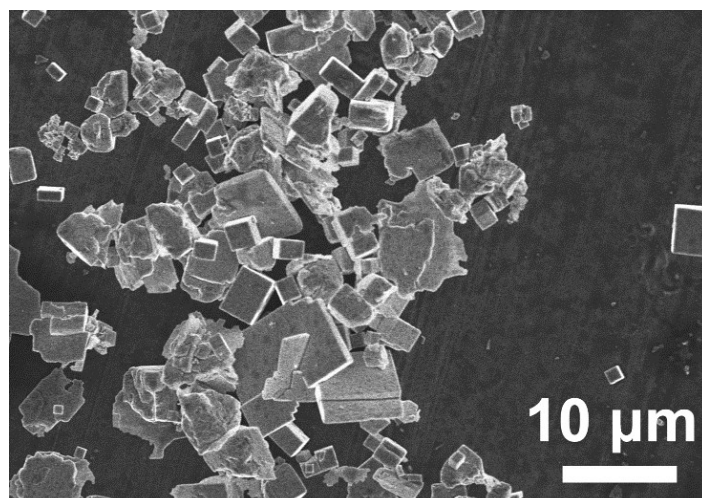

**Fig. S3** SEM image of Na<sub>0.5</sub>Bi<sub>0.5</sub>TiO<sub>3</sub> synthesized at 240 °C, 24 h, 10M.

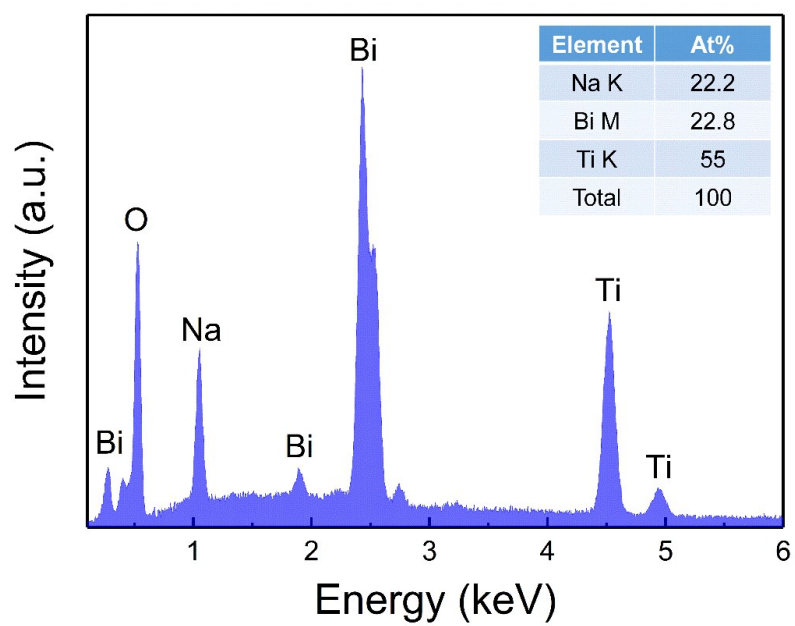

**Fig. S4** EDS spectrum of Na<sub>0.5</sub>Bi<sub>0.5</sub>TiO<sub>3</sub> nanowires.

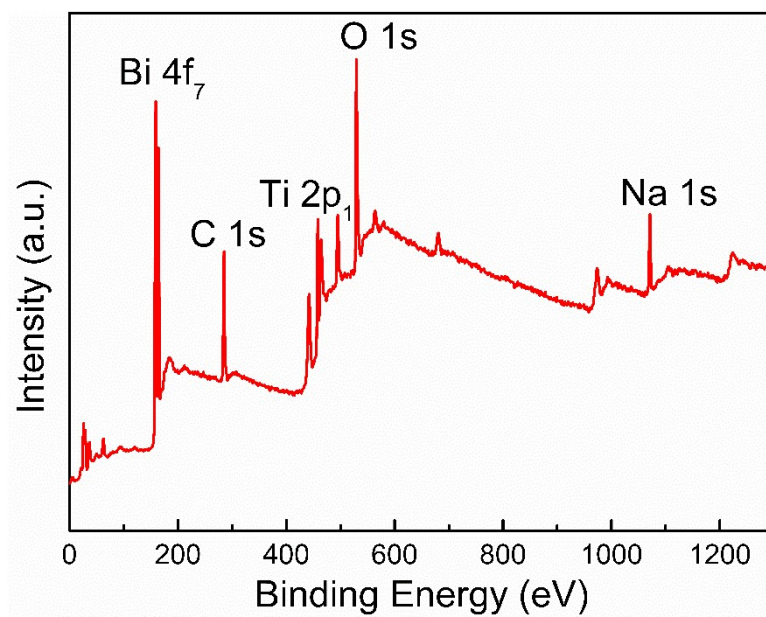

**Fig. S5** Survey XPS spectrum of the prepared  $\text{Na}_{0.5}\text{Bi}_{0.5}\text{TiO}_3$  nanowires.
